# Supplementary material for: Does hydrohalic acid HX (X = F, Cl) form true N-protonated twisted amide salts? Effects of anions on the ion-pair interactions and on the amide moiety in N-protonated tricyclic twisted amide salts
Source: Royal Society of Chemistry journal article supplement (doi:10.1039/c6nj01342b), 2016-01-01
Supplement: c6nj01342b1.pdf [file c6nj01342b1.pdf]

**Does hydrohalic acid HX (X = F, Cl) form true N-protonated twisted amide salts? Effects of anions on the ion-pair interactions and on the amide moiety in N-protonated tricyclic twisted amide salts**

**Krishna K. Pandey\***

School of Chemical Sciences, Devi Ahilya University Indore, Khandwa Road Campus, Indore 452001, India

\*Corresponding author. Tel.: 00 91 731 2460208; fax: 00 91 731 2762342.  
E-mail address: [k\\_k\\_pandey3@rediffmail.com](mailto:k_k_pandey3@rediffmail.com) (KKP).

**Supporting Information**

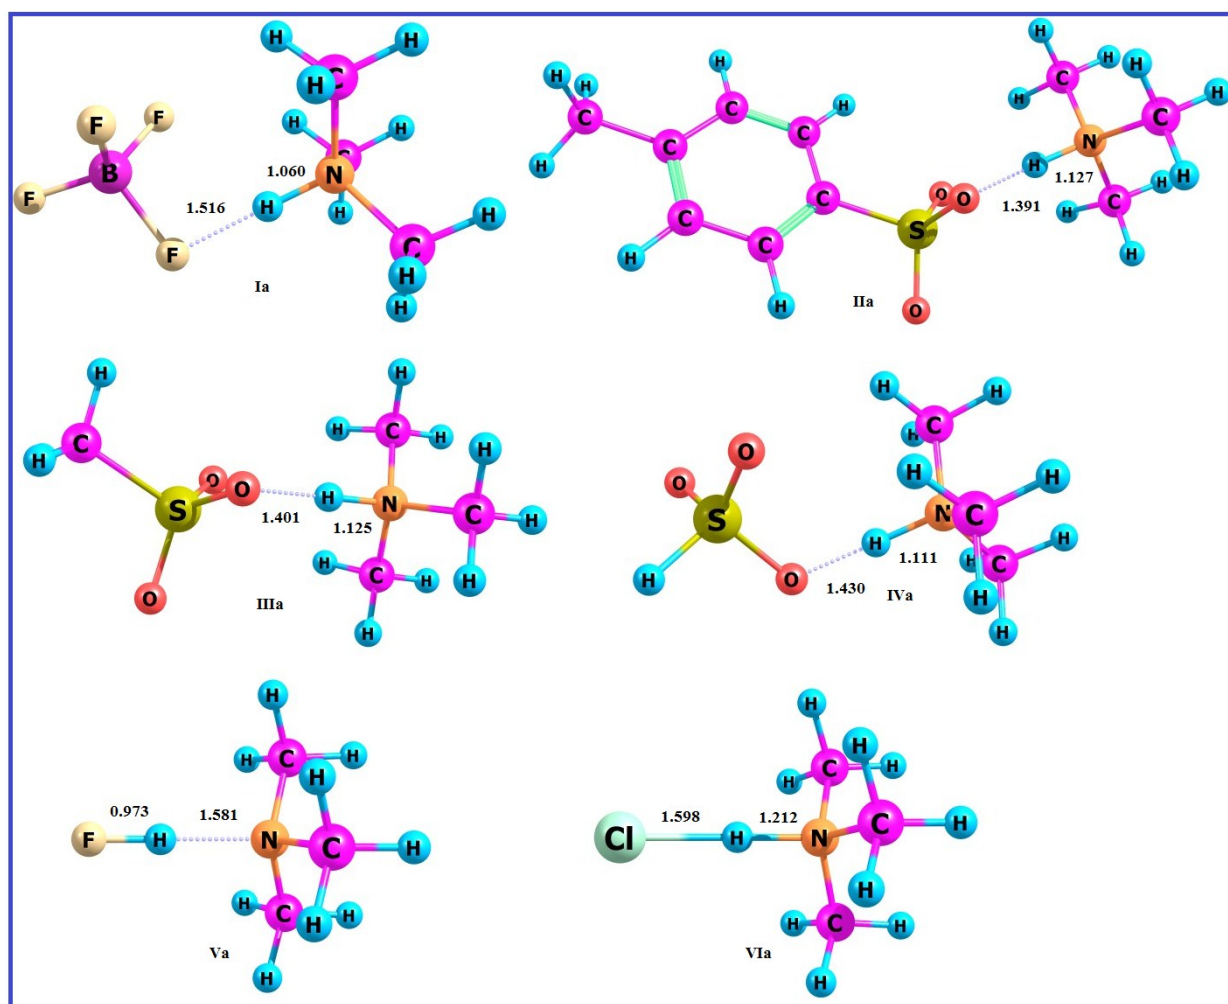

Fig. S1. Optimized structure of the [Me<sub>3</sub>NH]<sup>+</sup>[X]<sup>-</sup> salts (Ia-VIa).

Cartesian coordinates for optimized structures of the tricyclic twisted amide salts (**I-VI**) at DFT-D3(BJ)/def2-TZVPP level of theory with PBE and PBE0 functionals and  $[\text{Me}_3\text{NH}]^+[\text{X}]^-$  salts (**Ia-VIa**) at DFT-D3(BJ)/def2-TZVPP level of theory with PBE0 functional.

**PBE0-D3(BJ)**

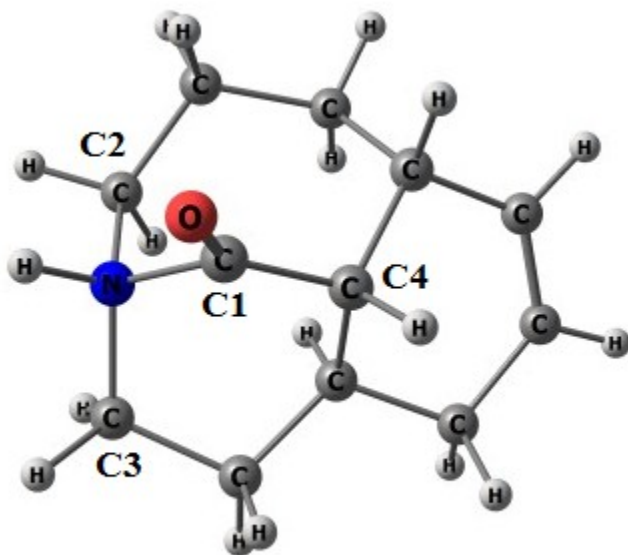

**I<sup>+</sup>**

|   |           |           |           |
|---|-----------|-----------|-----------|
| C | -0.257998 | -1.899028 | -1.631908 |
| C | -1.668068 | -2.444672 | -1.412314 |
| C | -0.112288 | -0.394453 | -1.448899 |
| C | -2.130769 | -2.583508 | 0.044737  |
| C | -3.617606 | -2.792962 | 0.130805  |
| C | -0.697826 | 1.358984  | 0.325863  |
| C | -4.474931 | -1.865085 | 0.546954  |
| C | -2.669185 | -0.171210 | 0.495898  |
| C | -4.089334 | -0.468499 | 0.940732  |
| C | -1.810803 | -1.362856 | 0.922254  |
| C | -0.366086 | -1.047305 | 0.958625  |
| C | -2.034628 | 1.105074  | 1.017667  |
| H | 0.020682  | -2.086139 | -2.671543 |
| H | -2.375869 | -1.819811 | -1.963969 |
| H | -1.732988 | -3.431786 | -1.873112 |
| H | -0.970708 | 0.126449  | -1.867310 |
| H | 0.780981  | -0.026153 | -1.951726 |
| H | 0.485391  | -2.437659 | -1.035470 |
| H | -0.826924 | 1.879721  | -0.621772 |
| H | -2.692112 | -0.125603 | -0.597472 |
| H | -3.985974 | -3.769397 | -0.163639 |
| H | 1.018636  | 0.192268  | 0.182090  |
| H | -1.623459 | -3.447947 | 0.484238  |

|   |           |           |           |
|---|-----------|-----------|-----------|
| H | -5.528964 | -2.112362 | 0.603689  |
| H | -2.669885 | 1.974840  | 0.843799  |
| H | -0.026416 | 1.946395  | 0.949833  |
| H | -2.059653 | -1.634029 | 1.953171  |
| H | -4.188876 | -0.340234 | 2.025990  |
| H | -1.893616 | 1.030222  | 2.099950  |
| N | 0.025844  | 0.064248  | -0.005309 |
| O | 0.503518  | -1.505369 | 1.615875  |
| H | -4.784552 | 0.244757  | 0.489706  |

**1<sup>+</sup> BF<sub>4</sub><sup>-</sup>**

|   |           |           |           |
|---|-----------|-----------|-----------|
| C | -0.017497 | -2.005368 | -1.560167 |
| C | -1.465312 | -2.468167 | -1.413054 |
| C | 0.221451  | -0.520483 | -1.328201 |
| C | -1.996384 | -2.590520 | 0.022668  |
| C | -3.494838 | -2.704702 | 0.042398  |
| C | -0.298882 | 1.210898  | 0.463969  |
| C | -4.307489 | -1.727490 | 0.436878  |
| C | -2.389425 | -0.157983 | 0.494528  |
| C | -3.843636 | -0.367491 | 0.873334  |
| C | -1.626591 | -1.407988 | 0.924809  |
| C | -0.154651 | -1.190119 | 1.015072  |
| C | -1.688551 | 1.054489  | 1.075674  |
| H | 0.295151  | -2.186232 | -2.590920 |
| H | -2.107767 | -1.787637 | -1.979610 |
| H | -1.578046 | -3.443791 | -1.891626 |
| H | -0.581079 | 0.069789  | -1.766828 |
| H | 1.161997  | -0.209880 | -1.780136 |
| H | 0.664186  | -2.603458 | -0.947515 |
| H | -0.314411 | 1.774107  | -0.465369 |
| H | -2.358376 | -0.082479 | -0.596454 |
| H | -3.917213 | -3.647384 | -0.290587 |
| H | 1.382952  | 0.004210  | 0.316509  |
| H | -1.564248 | -3.492929 | 0.467528  |
| H | -5.378087 | -1.903828 | 0.439175  |
| H | -2.246775 | 1.973801  | 0.889130  |
| H | 0.390905  | 1.723031  | 1.131330  |
| H | -1.930371 | -1.671860 | 1.942981  |
| H | -3.977531 | -0.253500 | 1.957154  |
| H | -1.619182 | 0.943934  | 2.162879  |
| N | 0.344906  | -0.113907 | 0.128088  |
| O | 0.611368  | -1.773602 | 1.709694  |
| H | -4.471950 | 0.400418  | 0.412430  |
| B | 3.181460  | 1.147604  | -0.778496 |
| F | 4.339273  | 1.833683  | -0.584556 |
| F | 3.259347  | 0.212705  | -1.807959 |
| F | 2.084146  | 1.996958  | -1.011411 |
| F | 2.845265  | 0.407886  | 0.435796  |

**1<sup>+</sup> OTs<sup>-</sup> (OTs<sup>-</sup> = p-MeC<sub>6</sub>H<sub>4</sub>SO<sub>3</sub><sup>-</sup>)**

|   |           |           |           |
|---|-----------|-----------|-----------|
| C | -0.202537 | -2.517054 | -1.133465 |
| C | -1.715468 | -2.731443 | -1.165644 |
| C | 0.243735  | -1.062541 | -1.082509 |
| C | 5.528416  | 0.132835  | -1.027747 |
| C | 6.898263  | -0.075669 | -1.022785 |
| C | 4.919842  | 0.700921  | 0.079307  |
| C | 7.674385  | 0.273850  | 0.078065  |
| C | 9.150316  | 0.018705  | 0.090197  |
| C | -2.465268 | -2.521140 | 0.159154  |
| C | -3.947784 | -2.418776 | -0.066155 |
| C | 5.675394  | 1.069666  | 1.182651  |
| C | 7.042033  | 0.853180  | 1.176086  |
| C | -0.234350 | 1.003063  | 0.298434  |
| C | -4.634682 | -1.282863 | 0.031115  |
| C | -2.510450 | -0.015017 | 0.182573  |
| C | -4.018672 | 0.053459  | 0.332600  |
| C | -2.039102 | -1.263182 | 0.922516  |
| C | -0.575157 | -1.250610 | 1.216941  |
| C | -1.703927 | 1.168059  | 0.680619  |
| H | 0.213970  | -2.918661 | -2.059998 |
| H | -2.142027 | -2.073849 | -1.928780 |
| H | -1.924416 | -3.748988 | -1.505212 |
| H | -0.373146 | -0.458535 | -1.747199 |
| H | 1.277351  | -0.947756 | -1.408521 |
| H | 4.925249  | -0.122797 | -1.889133 |
| H | 7.375601  | -0.511270 | -1.893925 |
| H | 0.268438  | -3.091556 | -0.330059 |
| H | 9.566526  | 0.042411  | -0.917914 |
| H | -0.026009 | 1.386941  | -0.698462 |
| H | -2.308596 | -0.141197 | -0.885552 |
| H | -4.468761 | -3.335823 | -0.323454 |
| H | 9.676813  | 0.758170  | 0.695158  |
| H | 1.298812  | -0.408098 | 0.625988  |
| H | -2.261284 | -3.383178 | 0.802921  |
| H | -5.708182 | -1.304054 | -0.126321 |
| H | 5.188212  | 1.536650  | 2.028927  |
| H | 9.370945  | -0.966090 | 0.512135  |
| H | 7.633268  | 1.147042  | 2.036556  |
| H | -2.062711 | 2.110838  | 0.263341  |
| H | 0.430882  | 1.531535  | 0.981409  |
| H | -2.526979 | -1.297502 | 1.902018  |
| H | -4.288299 | 0.371827  | 1.348211  |
| H | -1.810148 | 1.245037  | 1.767778  |
| N | 0.214253  | -0.434014 | 0.286966  |
| O | 2.708780  | 0.902821  | -1.277806 |
| O | 2.923709  | 2.192804  | 0.796874  |
| O | 2.650764  | -0.221818 | 0.863195  |
| O | -0.035260 | -1.835196 | 2.101410  |
| S | 3.172814  | 0.955176  | 0.097919  |
| H | -4.436232 | 0.809802  | -0.338737 |

**1<sup>+</sup> [MeSO<sub>3</sub>]<sup>-</sup>**

|   |           |           |           |
|---|-----------|-----------|-----------|
| C | -0.183129 | -2.490014 | -1.152621 |
| C | -1.693960 | -2.720468 | -1.170889 |
| C | 0.248120  | -1.030890 | -1.103202 |
| C | -2.433981 | -2.519245 | 0.160915  |
| C | -3.919315 | -2.430964 | -0.050936 |
| C | -0.236905 | 1.027046  | 0.285853  |
| C | -4.616675 | -1.302203 | 0.055228  |
| C | -2.503899 | -0.013593 | 0.189721  |
| C | -4.011153 | 0.039461  | 0.354157  |
| C | -2.013214 | -1.258363 | 0.922533  |
| C | -0.546914 | -1.231802 | 1.203425  |
| C | -1.704254 | 1.176396  | 0.682507  |
| H | 0.228796  | -2.885577 | -2.083841 |
| H | -2.134282 | -2.066372 | -1.929266 |
| H | -1.895583 | -3.739619 | -1.509841 |
| H | -0.383964 | -0.432800 | -1.758631 |
| H | 1.276400  | -0.902269 | -1.440583 |
| H | 0.301526  | -3.061249 | -0.354941 |
| H | -0.043754 | 1.413438  | -0.713174 |
| H | -2.311000 | -0.135708 | -0.880538 |
| H | -4.433480 | -3.352511 | -0.305785 |
| H | 1.311659  | -0.370254 | 0.600258  |
| H | -2.215719 | -3.380104 | 0.801589  |
| H | -5.691264 | -1.333666 | -0.092625 |
| H | -2.076690 | 2.116378  | 0.271096  |
| H | 0.430674  | 1.562350  | 0.960919  |
| H | -2.491607 | -1.299540 | 1.906461  |
| H | -4.274496 | 0.352964  | 1.372987  |
| H | -1.800969 | 1.249980  | 1.770852  |
| N | 0.226171  | -0.405754 | 0.268397  |
| O | 2.726608  | 0.902379  | -1.338187 |
| O | 2.886398  | 2.252362  | 0.697252  |
| O | 2.666060  | -0.172957 | 0.832867  |
| O | 0.006882  | -1.813594 | 2.081301  |
| S | 3.170113  | 0.996656  | 0.043018  |
| H | -4.442544 | 0.793429  | -0.311116 |
| C | 4.922987  | 0.776918  | 0.055241  |
| H | 5.265028  | 0.797970  | 1.087770  |
| H | 5.159735  | -0.177193 | -0.410574 |
| H | 5.362323  | 1.597801  | -0.508249 |

**1<sup>+</sup> [HSO<sub>3</sub>]<sup>-</sup>**

|   |           |           |           |
|---|-----------|-----------|-----------|
| C | -0.196651 | -2.508044 | -1.131242 |
| C | -1.708497 | -2.728619 | -1.167112 |
| C | 0.243265  | -1.051902 | -1.077791 |
| C | -2.462230 | -2.523012 | 0.156209  |
| C | -3.944413 | -2.423504 | -0.072200 |
| C | -0.241937 | 1.010965  | 0.308802  |

|   |           |           |           |
|---|-----------|-----------|-----------|
| C | -4.634537 | -1.289705 | 0.026576  |
| C | -2.514219 | -0.016477 | 0.185482  |
| C | -4.022832 | 0.047459  | 0.332825  |
| C | -2.041454 | -1.265387 | 0.923642  |
| C | -0.579772 | -1.248731 | 1.224243  |
| C | -1.712745 | 1.168447  | 0.687960  |
| H | 0.223958  | -2.906014 | -2.057479 |
| H | -2.135958 | -2.071921 | -1.930543 |
| H | -1.912450 | -3.746415 | -1.508433 |
| H | -0.377958 | -0.448133 | -1.737927 |
| H | 1.275882  | -0.928904 | -1.403333 |
| H | 0.275620  | -3.082294 | -0.328318 |
| H | -0.032263 | 1.397191  | -0.686852 |
| H | -2.310358 | -0.139784 | -0.882566 |
| H | -4.462239 | -3.341246 | -0.333029 |
| H | 1.271246  | -0.400090 | 0.634483  |
| H | -2.257644 | -3.385662 | 0.798929  |
| H | -5.707553 | -1.313130 | -0.133253 |
| H | -2.074232 | 2.110686  | 0.272176  |
| H | 0.419974  | 1.538006  | 0.995791  |
| H | -2.532055 | -1.303706 | 1.901610  |
| H | -4.295596 | 0.362762  | 1.348576  |
| H | -1.821540 | 1.242600  | 1.775017  |
| N | 0.210650  | -0.426573 | 0.295058  |
| O | 2.716027  | 0.890558  | -1.304280 |
| O | 2.966688  | 2.234717  | 0.729811  |
| O | 2.669588  | -0.184083 | 0.868037  |
| O | -0.037169 | -1.828680 | 2.109261  |
| S | 3.167332  | 0.970754  | 0.071358  |
| H | -4.440860 | 0.804588  | -0.337277 |
| H | 4.500412  | 0.750425  | 0.051496  |

**1<sup>+</sup> F<sup>-</sup>**

|   |           |           |           |
|---|-----------|-----------|-----------|
| C | -0.241533 | -1.932763 | -1.613477 |
| C | -1.689658 | -2.381400 | -1.404863 |
| C | 0.033227  | -0.445855 | -1.400430 |
| C | -2.162218 | -2.550856 | 0.049546  |
| C | -3.647398 | -2.773726 | 0.113748  |
| C | -0.761254 | 1.282126  | 0.252741  |
| C | -4.515575 | -1.867337 | 0.558069  |
| C | -2.716841 | -0.174994 | 0.553660  |
| C | -4.132865 | -0.482891 | 0.998855  |
| C | -1.839993 | -1.354039 | 0.949953  |
| C | -0.373175 | -1.047943 | 0.885610  |
| C | -2.051293 | 1.088439  | 1.051310  |
| H | 0.025478  | -2.130832 | -2.654862 |
| H | -2.353163 | -1.681427 | -1.921675 |
| H | -1.834019 | -3.342639 | -1.905514 |
| H | -0.699110 | 0.127009  | -1.977366 |
| H | 1.020929  | -0.208090 | -1.802154 |
| H | 0.445367  | -2.534178 | -1.011993 |

|   |           |           |           |
|---|-----------|-----------|-----------|
| H | -1.005304 | 1.711244  | -0.721353 |
| H | -2.738970 | -0.116604 | -0.540889 |
| H | -4.013849 | -3.739086 | -0.222951 |
| H | 1.537793  | 0.497061  | 0.296345  |
| H | -1.652885 | -3.426690 | 0.465183  |
| H | -5.569606 | -2.123827 | 0.595678  |
| H | -2.679451 | 1.972758  | 0.921688  |
| H | -0.095618 | 1.987342  | 0.754633  |
| H | -2.064308 | -1.643148 | 1.981838  |
| H | -4.222022 | -0.394841 | 2.089651  |
| H | -1.840198 | 1.002773  | 2.122844  |
| N | -0.010152 | 0.029369  | 0.010403  |
| F | 2.383033  | 0.947776  | 0.372485  |
| O | 0.461141  | -1.704162 | 1.440143  |
| H | -4.836915 | 0.242930  | 0.579941  |

### 1<sup>+</sup> Cl<sup>-</sup>

|    |           |           |           |
|----|-----------|-----------|-----------|
| C  | -0.245619 | -1.918123 | -1.603720 |
| C  | -1.676608 | -2.417475 | -1.401505 |
| C  | -0.034559 | -0.423053 | -1.390165 |
| C  | -2.155082 | -2.567015 | 0.051933  |
| C  | -3.641532 | -2.781310 | 0.112196  |
| C  | -0.709389 | 1.290066  | 0.326213  |
| C  | -4.506456 | -1.860792 | 0.532423  |
| C  | -2.695234 | -0.174360 | 0.526302  |
| C  | -4.119199 | -0.472292 | 0.954706  |
| C  | -1.832948 | -1.360781 | 0.939130  |
| C  | -0.366789 | -1.052681 | 0.922747  |
| C  | -2.041455 | 1.086937  | 1.050463  |
| H  | 0.033480  | -2.108017 | -2.643005 |
| H  | -2.358496 | -1.751730 | -1.939111 |
| H  | -1.781667 | -3.393470 | -1.882369 |
| H  | -0.824226 | 0.127283  | -1.907392 |
| H  | 0.922168  | -0.124245 | -1.826275 |
| H  | 0.464617  | -2.490423 | -1.000126 |
| H  | -0.873925 | 1.790426  | -0.628623 |
| H  | -2.703053 | -0.114719 | -0.567661 |
| H  | -4.011284 | -3.750188 | -0.209680 |
| H  | 1.360980  | 0.383953  | 0.197526  |
| H  | -1.651481 | -3.438938 | 0.482424  |
| H  | -5.562492 | -2.108915 | 0.566069  |
| H  | -2.663290 | 1.971182  | 0.894974  |
| H  | -0.031618 | 1.920658  | 0.904833  |
| H  | -2.074926 | -1.637636 | 1.970459  |
| H  | -4.223056 | -0.366355 | 2.042665  |
| H  | -1.884900 | 0.997063  | 2.130727  |
| N  | 0.012202  | 0.025642  | 0.030934  |
| Cl | 2.692156  | 0.953378  | 0.170487  |
| O  | 0.456266  | -1.654340 | 1.542909  |
| H  | -4.812988 | 0.251766  | 0.516309  |

**PBE-D3(BJ)****1+**

|   |           |           |           |
|---|-----------|-----------|-----------|
| C | -0.249059 | -1.905200 | -1.644162 |
| C | -1.669298 | -2.449981 | -1.423849 |
| C | -0.094790 | -0.392664 | -1.464594 |
| C | -2.135321 | -2.596750 | 0.041923  |
| C | -3.628917 | -2.806165 | 0.133209  |
| C | -0.695917 | 1.380548  | 0.325604  |
| C | -4.492697 | -1.871064 | 0.553606  |
| C | -2.673719 | -0.167296 | 0.502986  |
| C | -4.103724 | -0.467905 | 0.947162  |
| C | -1.809252 | -1.367855 | 0.933389  |
| C | -0.359704 | -1.061522 | 0.979086  |
| C | -2.037174 | 1.119399  | 1.024363  |
| H | 0.032431  | -2.097407 | -2.690101 |
| H | -2.380870 | -1.815987 | -1.974739 |
| H | -1.739750 | -3.441695 | -1.891828 |
| H | -0.955350 | 0.136104  | -1.888674 |
| H | 0.809193  | -0.027918 | -1.966974 |
| H | 0.497114  | -2.449776 | -1.043329 |
| H | -0.829079 | 1.901130  | -0.630125 |
| H | -2.694379 | -0.123587 | -0.597963 |
| H | -3.997783 | -3.791348 | -0.159683 |
| H | 1.039574  | 0.206103  | 0.185145  |
| H | -1.621256 | -3.467030 | 0.480898  |
| H | -5.553606 | -2.119594 | 0.615106  |
| H | -2.681621 | 1.991200  | 0.846933  |
| H | -0.019148 | 1.973698  | 0.950977  |
| H | -2.067580 | -1.650102 | 1.967430  |
| H | -4.207944 | -0.334191 | 2.039152  |
| H | -1.894488 | 1.048049  | 2.113853  |
| N | 0.039573  | 0.076291  | -0.008898 |
| O | 0.521849  | -1.521687 | 1.640409  |
| H | -4.801776 | 0.251092  | 0.491125  |

**1+ BF<sub>4</sub><sup>-</sup>**

|   |           |           |           |
|---|-----------|-----------|-----------|
| C | -0.012699 | -2.014788 | -1.570957 |
| C | -1.470152 | -2.478242 | -1.423467 |
| C | 0.232761  | -0.522273 | -1.339061 |
| C | -2.006178 | -2.604388 | 0.021269  |
| C | -3.511606 | -2.719057 | 0.043597  |
| C | -0.298592 | 1.226552  | 0.468438  |
| C | -4.331055 | -1.734376 | 0.441690  |
| C | -2.399847 | -0.155116 | 0.501035  |
| C | -3.864128 | -0.367794 | 0.878894  |
| C | -1.630746 | -1.413872 | 0.934234  |
| C | -0.152256 | -1.202106 | 1.029958  |
| C | -1.696024 | 1.066591  | 1.083722  |
| H | 0.302098  | -2.198658 | -2.608570 |
| H | -2.115980 | -1.790208 | -1.991298 |



|   |           |           |           |
|---|-----------|-----------|-----------|
| H | -1.586942 | -3.459170 | -1.907016 |
| H | -0.572826 | 0.074998  | -1.781327 |
| H | 1.184740  | -0.213539 | -1.788452 |
| H | 0.672156  | -2.618842 | -0.954788 |
| H | -0.314263 | 1.791302  | -0.468704 |
| H | -2.366649 | -0.080052 | -0.597411 |
| H | -3.935089 | -3.669235 | -0.290803 |
| H | 1.409012  | 0.014481  | 0.324308  |
| H | -1.568641 | -3.512710 | 0.467407  |
| H | -5.408831 | -1.911500 | 0.446128  |
| H | -2.260659 | 1.989966  | 0.893131  |
| H | 0.396151  | 1.742396  | 1.139597  |
| H | -1.942187 | -1.685518 | 1.956417  |
| H | -4.001435 | -0.249510 | 1.969737  |
| H | -1.627236 | 0.958114  | 2.178401  |
| N | 0.355523  | -0.108389 | 0.130273  |
| O | 0.623206  | -1.794201 | 1.729246  |
| H | -4.495664 | 0.405979  | 0.414052  |
| B | 3.209689  | 1.165965  | -0.789448 |
| F | 3.263617  | 0.217362  | -1.829864 |
| F | 2.116330  | 2.045610  | -1.013778 |
| F | 2.863763  | 0.416500  | 0.447581  |
| F | 4.394754  | 1.830445  | -0.595035 |

**1<sup>+</sup> OTs<sup>-</sup> (OTs<sup>-</sup> = p-MeC<sub>6</sub>H<sub>4</sub>SO<sub>3</sub><sup>-</sup>)**

|   |           |           |           |
|---|-----------|-----------|-----------|
| C | -0.243615 | -2.503258 | -1.209819 |
| C | -1.765903 | -2.722788 | -1.201463 |
| C | 0.205065  | -1.040548 | -1.150662 |
| C | 5.603410  | 0.082311  | -1.035641 |
| C | 6.982093  | -0.122269 | -0.984875 |
| C | 4.960460  | 0.697313  | 0.038787  |
| C | 7.734278  | 0.276365  | 0.128682  |
| C | 9.216843  | 0.024956  | 0.190872  |
| C | -2.484758 | -2.537005 | 0.156245  |
| C | -3.980983 | -2.439954 | -0.023351 |
| C | 5.689934  | 1.115896  | 1.153875  |
| C | 7.065945  | 0.902039  | 1.192037  |
| C | -0.258787 | 1.022354  | 0.277637  |
| C | -4.677921 | -1.301504 | 0.113423  |
| C | -2.544138 | -0.014534 | 0.223895  |
| C | -4.057652 | 0.040296  | 0.417813  |
| C | -2.038463 | -1.279039 | 0.934748  |
| C | -0.559782 | -1.267995 | 1.188096  |
| C | -1.723594 | 1.173222  | 0.716394  |
| H | 0.149490  | -2.894135 | -2.159915 |
| H | -2.219081 | -2.047911 | -1.944635 |
| H | -1.984929 | -3.741266 | -1.555079 |
| H | -0.435778 | -0.426502 | -1.796028 |
| H | 1.238142  | -0.918959 | -1.502489 |
| H | 5.019680  | -0.211824 | -1.907223 |

|   |           |           |           |
|---|-----------|-----------|-----------|
| H | 7.486735  | -0.594279 | -1.830479 |
| H | 0.254755  | -3.092621 | -0.423987 |
| H | 9.661863  | -0.003898 | -0.812485 |
| H | -0.094281 | 1.417454  | -0.731375 |
| H | -2.370601 | -0.124863 | -0.858751 |
| H | -4.505863 | -3.363535 | -0.280336 |
| H | 9.731467  | 0.799697  | 0.774711  |
| H | 1.339610  | -0.389670 | 0.562341  |
| H | -2.252777 | -3.413240 | 0.784063  |
| H | -5.762866 | -1.326867 | -0.012037 |
| H | 5.175784  | 1.618965  | 1.972197  |
| H | 9.431220  | -0.942204 | 0.672230  |
| H | 7.637203  | 1.235155  | 2.060995  |
| H | -2.105547 | 2.125972  | 0.323470  |
| H | 0.433152  | 1.556080  | 0.941751  |
| H | -2.504002 | -1.336391 | 1.932619  |
| H | -4.302586 | 0.346858  | 1.451750  |
| H | -1.794105 | 1.233690  | 1.814823  |
| N | 0.208302  | -0.421485 | 0.238020  |
| O | 2.763228  | 0.856670  | -1.408496 |
| O | 2.918503  | 2.223533  | 0.668100  |
| O | 2.660043  | -0.230519 | 0.797963  |
| O | 0.015688  | -1.877806 | 2.051438  |
| S | 3.196165  | 0.954041  | -0.004693 |
| H | -4.501720 | 0.810115  | -0.233472 |

**1<sup>+</sup> [MeSO<sub>3</sub>]<sup>-</sup>**

|   |           |           |           |
|---|-----------|-----------|-----------|
| C | -0.185298 | -2.490183 | -1.180081 |
| C | -1.705295 | -2.725973 | -1.184951 |
| C | 0.247171  | -1.022121 | -1.133205 |
| C | -2.440777 | -2.531272 | 0.162699  |
| C | -3.935902 | -2.452374 | -0.034147 |
| C | -0.254179 | 1.052062  | 0.263718  |
| C | -4.646413 | -1.319982 | 0.081833  |
| C | -2.527809 | -0.009013 | 0.199660  |
| C | -4.043729 | 0.031824  | 0.377275  |
| C | -2.016070 | -1.259414 | 0.930660  |
| C | -0.539915 | -1.230045 | 1.198020  |
| C | -1.724760 | 1.193026  | 0.686257  |
| H | 0.221677  | -2.887635 | -2.121586 |
| H | -2.157463 | -2.064866 | -1.941002 |
| H | -1.909973 | -3.750889 | -1.528502 |
| H | -0.394443 | -0.423400 | -1.792219 |
| H | 1.282209  | -0.892631 | -1.476964 |
| H | 0.310635  | -3.065432 | -0.382325 |
| H | -0.084665 | 1.435504  | -0.749013 |
| H | -2.341683 | -0.130277 | -0.879743 |
| H | -4.448130 | -3.384411 | -0.286171 |
| H | 1.361990  | -0.336967 | 0.587780  |
| H | -2.206580 | -3.397405 | 0.803614  |

|   |           |           |           |
|---|-----------|-----------|-----------|
| H | -5.729601 | -1.358503 | -0.055048 |
| H | -2.112635 | 2.137142  | 0.278517  |
| H | 0.425401  | 1.603180  | 0.926414  |
| H | -2.491190 | -1.310040 | 1.924385  |
| H | -4.302693 | 0.347267  | 1.405123  |
| H | -1.806892 | 1.265489  | 1.783189  |
| N | 0.229212  | -0.386487 | 0.248014  |
| O | 2.813908  | 0.857805  | -1.396646 |
| O | 2.901985  | 2.294575  | 0.631186  |
| O | 2.668371  | -0.164315 | 0.842747  |
| O | 0.032255  | -1.827015 | 2.072961  |
| S | 3.207178  | 1.003140  | 0.014696  |
| H | -4.489227 | 0.789430  | -0.287231 |
| C | 4.976402  | 0.764678  | 0.112353  |
| H | 5.274941  | 0.814377  | 1.164589  |
| H | 5.224589  | -0.210979 | -0.317866 |
| H | 5.448125  | 1.570946  | -0.459643 |

### 1<sup>+</sup> [HSO<sub>3</sub>]<sup>-</sup>

|   |           |           |           |
|---|-----------|-----------|-----------|
| C | -0.189936 | -2.510364 | -1.146879 |
| C | -1.711113 | -2.734697 | -1.179111 |
| C | 0.251494  | -1.045725 | -1.093712 |
| C | -2.468777 | -2.533773 | 0.155165  |
| C | -3.959349 | -2.439563 | -0.067710 |
| C | -0.250139 | 1.034386  | 0.301446  |
| C | -4.660396 | -1.300236 | 0.036329  |
| C | -2.531555 | -0.009965 | 0.192384  |
| C | -4.049988 | 0.045526  | 0.342912  |
| C | -2.046162 | -1.266113 | 0.932316  |
| C | -0.577470 | -1.249885 | 1.231699  |
| C | -1.727450 | 1.185658  | 0.693798  |
| H | 0.231620  | -2.911132 | -2.080438 |
| H | -2.144856 | -2.071095 | -1.943663 |
| H | -1.917076 | -3.758296 | -1.525460 |
| H | -0.376632 | -0.439623 | -1.758227 |
| H | 1.292428  | -0.919665 | -1.420241 |
| H | 0.288066  | -3.088648 | -0.340401 |
| H | -0.052598 | 1.418878  | -0.705630 |
| H | -2.327936 | -0.133160 | -0.883542 |
| H | -4.476034 | -3.366535 | -0.328807 |
| H | 1.309379  | -0.377758 | 0.638996  |
| H | -2.254537 | -3.402254 | 0.799801  |
| H | -5.741308 | -1.327900 | -0.119273 |
| H | -2.099606 | 2.132061  | 0.277101  |
| H | 0.421336  | 1.572089  | 0.982933  |
| H | -2.541467 | -1.313407 | 1.916234  |
| H | -4.324469 | 0.363767  | 1.365808  |
| H | -1.830649 | 1.260279  | 1.788667  |
| N | 0.217982  | -0.411653 | 0.290027  |
| O | 2.818752  | 0.827800  | -1.337095 |

|   |           |           |           |
|---|-----------|-----------|-----------|
| O | 2.973303  | 2.263650  | 0.690706  |
| O | 2.676474  | -0.189172 | 0.904793  |
| O | -0.023074 | -1.842034 | 2.119619  |
| S | 3.207128  | 0.962453  | 0.073446  |
| H | -4.475572 | 0.807378  | -0.329641 |
| H | 4.553666  | 0.735871  | 0.131360  |

**1<sup>+</sup> F<sup>-</sup>**

|   |           |           |           |
|---|-----------|-----------|-----------|
| C | -0.206712 | -1.961777 | -1.633224 |
| C | -1.697843 | -2.302818 | -1.434345 |
| C | 0.205916  | -0.500271 | -1.395484 |
| C | -2.177394 | -2.527842 | 0.024116  |
| C | -3.669642 | -2.755650 | 0.095410  |
| C | -0.837316 | 1.269147  | 0.127246  |
| C | -4.543076 | -1.875978 | 0.612127  |
| C | -2.754828 | -0.173326 | 0.617199  |
| C | -4.158702 | -0.502398 | 1.111223  |
| C | -1.849114 | -1.354273 | 0.976733  |
| C | -0.375782 | -1.059759 | 0.874429  |
| C | -2.057073 | 1.107817  | 1.044873  |
| H | 0.057425  | -2.169897 | -2.681625 |
| H | -2.315241 | -1.521839 | -1.905997 |
| H | -1.921457 | -3.225953 | -1.990441 |
| H | -0.365792 | 0.148888  | -2.075770 |
| H | 1.269998  | -0.381931 | -1.646272 |
| H | 0.422602  | -2.631450 | -1.028547 |
| H | -1.187556 | 1.557574  | -0.875767 |
| H | -2.831002 | -0.127740 | -0.483419 |
| H | -4.037946 | -3.711102 | -0.288276 |
| H | 1.469505  | 0.571118  | 0.400499  |
| H | -1.660161 | -3.424106 | 0.405369  |
| H | -5.601031 | -2.145315 | 0.658458  |
| H | -2.695248 | 1.996738  | 0.933873  |
| H | -0.174461 | 2.070460  | 0.485305  |
| H | -2.058309 | -1.686562 | 2.006385  |
| H | -4.210964 | -0.462213 | 2.214779  |
| H | -1.756929 | 1.055836  | 2.104467  |
| N | -0.020607 | 0.025685  | -0.004232 |
| F | 2.306873  | 1.063424  | 0.512244  |
| O | 0.478859  | -1.773184 | 1.358103  |
| H | -4.887397 | 0.240192  | 0.747360  |

**1<sup>+</sup> Cl<sup>-</sup>**

|   |           |           |           |
|---|-----------|-----------|-----------|
| C | -0.233915 | -1.930684 | -1.616461 |
| C | -1.679328 | -2.417736 | -1.412800 |
| C | -0.000522 | -0.430156 | -1.402042 |
| C | -2.161515 | -2.574904 | 0.050160  |
| C | -3.654722 | -2.791350 | 0.113944  |
| C | -0.715503 | 1.305807  | 0.314668  |
| C | -4.527255 | -1.866584 | 0.543303  |

|    |           |           |           |
|----|-----------|-----------|-----------|
| C  | -2.706179 | -0.169094 | 0.538127  |
| C  | -4.138297 | -0.472103 | 0.970015  |
| C  | -1.834500 | -1.361963 | 0.949977  |
| C  | -0.359172 | -1.063975 | 0.927958  |
| C  | -2.046021 | 1.101166  | 1.058389  |
| H  | 0.044834  | -2.123264 | -2.663379 |
| H  | -2.359646 | -1.735704 | -1.947107 |
| H  | -1.798210 | -3.395492 | -1.903455 |
| H  | -0.778161 | 0.136815  | -1.934971 |
| H  | 0.976461  | -0.143928 | -1.820616 |
| H  | 0.474361  | -2.516954 | -1.011072 |
| H  | -0.894565 | 1.790971  | -0.653907 |
| H  | -2.716283 | -0.110170 | -0.563533 |
| H  | -4.024676 | -3.766950 | -0.212212 |
| H  | 1.364701  | 0.400540  | 0.213289  |
| H  | -1.650916 | -3.453034 | 0.479057  |
| H  | -5.589982 | -2.117628 | 0.580285  |
| H  | -2.674573 | 1.990164  | 0.904366  |
| H  | -0.029836 | 1.953421  | 0.879255  |
| H  | -2.078829 | -1.648301 | 1.986392  |
| H  | -4.242182 | -0.365814 | 2.065855  |
| H  | -1.878424 | 1.014542  | 2.144563  |
| N  | 0.025430  | 0.032543  | 0.031877  |
| Cl | 2.708107  | 0.995806  | 0.195039  |
| O  | 0.476880  | -1.692777 | 1.529480  |
| H  | -4.837965 | 0.258288  | 0.532353  |

### Ia

|   |           |           |           |
|---|-----------|-----------|-----------|
| C | 0.143514  | -0.379813 | -1.344824 |
| F | 4.451191  | 1.480989  | -0.580382 |
| C | -0.424944 | 1.259205  | 0.372559  |
| H | -0.905203 | -0.587265 | -1.557720 |
| H | 0.515685  | 0.442275  | -1.949312 |
| H | 0.005565  | 2.035190  | -0.255094 |
| H | 1.304249  | 0.164997  | 0.274157  |
| H | -0.270301 | 1.512865  | 1.419451  |
| N | 0.276278  | -0.005562 | 0.079280  |
| F | 3.190754  | -0.135623 | -1.625864 |
| F | 2.236681  | 1.863876  | -1.079413 |
| F | 2.777391  | 0.377966  | 0.562174  |
| B | 3.222706  | 0.920534  | -0.726116 |
| H | 0.758755  | -1.255368 | -1.535184 |
| H | -1.489029 | 1.136559  | 0.170857  |
| C | -0.150213 | -1.096634 | 0.971429  |
| H | -1.208869 | -1.302300 | 0.815428  |
| H | 0.437998  | -1.983921 | 0.747252  |
| H | 0.022409  | -0.799765 | 2.003828  |

### IIa

|   |          |           |           |
|---|----------|-----------|-----------|
| C | 0.589632 | -1.004237 | -1.140244 |
| C | 5.254660 | 0.188077  | -0.834931 |
| C | 6.581113 | -0.196687 | -0.940263 |

|   |           |           |           |
|---|-----------|-----------|-----------|
| C | 4.835136  | 0.906835  | 0.273312  |
| C | 7.503958  | 0.125873  | 0.050814  |
| C | 8.931176  | -0.316414 | -0.053879 |
| C | 5.740690  | 1.251732  | 1.265185  |
| C | 7.063402  | 0.859662  | 1.149477  |
| C | -0.425091 | 0.876793  | 0.016967  |
| H | -0.347932 | -1.252151 | -1.641389 |
| H | 1.170601  | -0.296010 | -1.727187 |
| H | 4.543773  | -0.043479 | -1.617577 |
| H | 6.910102  | -0.749019 | -1.813868 |
| H | 9.233281  | -0.443641 | -1.094176 |
| H | 0.162191  | 1.538583  | -0.616122 |
| H | 9.605496  | 0.402892  | 0.412949  |
| H | 1.310989  | -0.119634 | 0.617798  |
| H | 5.402523  | 1.838706  | 2.109330  |
| H | 9.078830  | -1.276035 | 0.450092  |
| H | 7.771629  | 1.137085  | 1.922649  |
| H | -0.537877 | 1.333456  | 0.998671  |
| N | 0.312922  | -0.387556 | 0.165050  |
| O | 2.577277  | 1.428231  | -0.901306 |
| O | 3.107650  | 2.601322  | 1.193387  |
| O | 2.524144  | 0.238556  | 1.196245  |
| S | 3.138972  | 1.377865  | 0.440002  |
| H | 1.174401  | -1.909395 | -0.984972 |
| H | -1.406068 | 0.683905  | -0.420730 |
| C | -0.355183 | -1.311449 | 1.085702  |
| H | -1.331166 | -1.598452 | 0.690068  |
| H | 0.264078  | -2.197671 | 1.212797  |
| H | -0.479179 | -0.822887 | 2.050420  |

### IIIa

|   |           |           |           |
|---|-----------|-----------|-----------|
| C | 0.233005  | -0.985090 | -1.127609 |
| C | -0.335729 | 1.034484  | 0.100020  |
| H | -0.773404 | -1.051199 | -1.544839 |
| H | 0.884237  | -0.391650 | -1.766505 |
| H | 0.284954  | 1.587417  | -0.602118 |
| H | 1.252481  | -0.245236 | 0.542680  |
| H | -0.263093 | 1.504118  | 1.079297  |
| N | 0.187472  | -0.338658 | 0.191707  |
| O | 2.628128  | 1.094773  | -1.146554 |
| O | 3.116042  | 2.276572  | 0.943604  |
| O | 2.585160  | -0.105682 | 0.953272  |
| S | 3.181467  | 1.045785  | 0.199142  |
| C | 4.886673  | 0.606951  | 0.046507  |
| H | 5.308707  | 0.513097  | 1.044953  |
| H | 4.963175  | -0.333418 | -0.495056 |
| H | 5.384147  | 1.404979  | -0.501381 |
| H | 0.651775  | -1.983806 | -1.015817 |
| H | -1.375402 | 1.012312  | -0.230925 |
| C | -0.538639 | -1.138633 | 1.182065  |
| H | -1.582802 | -1.250576 | 0.884762  |
| H | -0.072272 | -2.119252 | 1.259052  |

|            |           |           |           |
|------------|-----------|-----------|-----------|
| H          | -0.483258 | -0.640770 | 2.148459  |
| <b>Iva</b> |           |           |           |
| C          | 0.192815  | -0.997887 | -1.111100 |
| C          | -0.377924 | 1.022341  | 0.116898  |
| H          | -0.813144 | -1.064663 | -1.528404 |
| H          | 0.842686  | -0.402514 | -1.749069 |
| H          | 0.263568  | 1.580671  | -0.561825 |
| H          | 1.190078  | -0.266613 | 0.568325  |
| H          | -0.337178 | 1.479504  | 1.103777  |
| N          | 0.142083  | -0.352105 | 0.209664  |
| O          | 2.576255  | 1.063791  | -1.057725 |
| O          | 3.585916  | 2.069210  | 0.944602  |
| O          | 2.532414  | -0.133827 | 1.042035  |
| S          | 3.248076  | 0.881716  | 0.217271  |
| H          | 4.413256  | 0.255884  | -0.064858 |
| H          | 0.612658  | -1.995798 | -0.998153 |
| H          | -1.407216 | 1.002771  | -0.244250 |
| C          | -0.592998 | -1.153996 | 1.194407  |
| H          | -1.637517 | -1.251079 | 0.895457  |
| H          | -0.136867 | -2.139704 | 1.261585  |
| H          | -0.531411 | -0.665144 | 2.164635  |
| <b>Va</b>  |           |           |           |
| C          | -0.085412 | -0.413023 | -1.404269 |
| C          | -0.719866 | 1.320018  | 0.128416  |
| H          | -1.118425 | -0.605131 | -1.728211 |
| H          | 0.354075  | 0.335382  | -2.063952 |
| H          | -0.279416 | 2.063031  | -0.536885 |
| H          | 1.493531  | 0.297041  | 0.326151  |
| H          | -0.610520 | 1.670242  | 1.155055  |
| N          | -0.026944 | 0.053412  | -0.030056 |
| F          | 2.429960  | 0.445349  | 0.546844  |
| H          | 0.487865  | -1.335390 | -1.501453 |
| H          | -1.791481 | 1.232993  | -0.102194 |
| C          | -0.538628 | -0.947720 | 0.889454  |
| H          | -1.598364 | -1.172995 | 0.701095  |
| H          | 0.038108  | -1.867142 | 0.786451  |
| H          | -0.433866 | -0.590515 | 1.914235  |
| <b>VIa</b> |           |           |           |
| C          | -0.239555 | -0.408762 | -1.418789 |
| C          | -0.773882 | 1.321565  | 0.200328  |
| H          | -1.281108 | -0.560610 | -1.714143 |
| H          | 0.216089  | 0.352123  | -2.050244 |
| H          | -0.311242 | 2.052384  | -0.460908 |
| H          | 1.030685  | 0.166124  | 0.206762  |
| H          | -0.593534 | 1.623930  | 1.230598  |
| N          | -0.149460 | 0.020335  | -0.025178 |
| Cl         | 2.586995  | 0.364067  | 0.508441  |
| H          | -1.849369 | 1.276820  | 0.009788  |
| H          | 0.317231  | -1.336764 | -1.537057 |

|   |           |           |          |
|---|-----------|-----------|----------|
| C | -0.628479 | -0.998146 | 0.905721 |
| H | -1.694769 | -1.190310 | 0.760364 |
| H | -0.063343 | -1.914845 | 0.745651 |
| H | -0.450861 | -0.655535 | 1.923761 |
